# Supplementary material for: The arachidonic acid metabolome reveals elevation of prostaglandin E2 biosynthesis in colorectal cancer
Source: Royal Society of Chemistry journal article supplement (doi:10.1039/d3an01723k), 2024-01-01
Supplement: d3an01723k1.pdf [file d3an01723k1.pdf]

**Table S1 The MRM transitions and optimized DP and CE**

| <b>NO.</b> | <b>Q1<br/>(Da)</b> | <b>Q3<br/>(Da)</b> | <b>Compound</b>   | <b>DP<br/>(V)</b> | <b>EP<br/>(V)</b> | <b>CE<br/>(ev)</b> | <b>CXP<br/>(V)</b> |
|------------|--------------------|--------------------|-------------------|-------------------|-------------------|--------------------|--------------------|
| 1          | 324.3              | 277.2              | 10-Nitrolinoleate | -40               | -8                | -18                | -13                |
| 2          | 326.2              | 279.5              | 10-Nitrooleate    | -40               | -8                | -24                | -13                |
| 3          | 317.2              | 167.2              | 11(12)-EpETE      | -40               | -6                | -18                | -13                |
| 4          | 319.2              | 167.1              | 11(12)-EpETrE     | -40               | -6                | -21                | -13                |
| 5          | 337.2              | 166.9              | 11,12-DHET        | -44               | -6                | -28                | -26                |
| 6          | 337.3              | 167.1              | 11,12-DiHETrE     | -55               | -6                | -27                | -13                |
| 7          | 319.3              | 167.2              | 11,12-EET         | -45               | -4                | -21                | -18                |
| 8          | 319.3              | 167.2              | 11-HETE           | -35               | -6                | -23                | -20                |
| 9          | 309.2              | 291.2              | 12(13)-Ep-9-KODE  | -90               | -6                | -21                | -13                |
| 10         | 293.2              | 183.2              | 12(13)-EpODE      | -50               | -6                | -24                | -13                |
| 11         | 295.2              | 195.2              | 12(13)-EpOME      | -85               | -6                | -21                | -13                |
| 12         | 311.2              | 183.2              | 12,13-DiHODE      | -60               | -6                | -27                | -13                |
| 13         | 313.3              | 183.2              | 12,13-DiHOME      | -70               | -6                | -30                | -13                |
| 14         | 317.2              | 179.1              | 12-HEPE           | -45               | -6                | -18                | -13                |
| 15         | 319.2              | 179.1              | 12-HETE           | -60               | -6                | -21                | -13                |
| 16         | 295.1              | 194.8              | 13-HODE           | -40               | -5                | -20                | -21                |
| 17         | 295.2              | 195.2              | 13-HODE-2         | -90               | -6                | -24                | -13                |
| 18         | 293.2              | 195.2              | 13-HOTE           | -70               | -6                | -24                | -13                |
| 19         | 293.2              | 179.1              | 13-KODE           | -80               | -6                | -27                | -13                |
| 20         | 317.2              | 247.2              | 14(15)-EpETE      | -35               | -6                | -18                | -13                |
| 21         | 319.2              | 219.2              | 14(15)-EpETrE     | -50               | -6                | -18                | -13                |
| 22         | 337.2              | 207.2              | 14,15-DHET        | -42               | -6                | -26                | -19                |
| 23         | 335.3              | 207.2              | 14,15-DiHETE      | -40               | -6                | -24                | -13                |
| 24         | 337.3              | 207.2              | 14,15-DiHETrE     | -60               | -6                | -24                | -13                |
| 25         | 319.3              | 219.0              | 14,15-EET         | -45               | -5                | -20                | -21                |
| 26         | 343.3              | 281.2              | 14-HDoHE          | -60               | -6                | -18                | -13                |
| 27         | 293.2              | 275.2              | 15(16)-EpODE      | -65               | -6                | -18                | -13                |
| 28         | 311.2              | 235.2              | 15,16-DiHODE      | -55               | -6                | -27                | -13                |
| 29         | 315.2              | 271.2              | 15-deoxy PGJ2     | -50               | -9                | -21                | -13                |

## Continued

| NO. | Q1<br>(Da) | Q3<br>(Da) | Compound                 | DP<br>(V) | EP<br>(V) | CE<br>(ev) | CXP<br>(V) |
|-----|------------|------------|--------------------------|-----------|-----------|------------|------------|
| 30  | 315.2      | 271.3      | 15-deoxy-delta12,14-PGJ2 | -25       | -9        | -21        | -18        |
| 31  | 317.2      | 219.2      | 15-HEPE                  | -55       | -6        | -18        | -13        |
| 32  | 319.2      | 219.0      | 15-HETE                  | -40       | -5        | -20        | -22        |
| 33  | 319.2      | 219.2      | 15-HETE-2                | -55       | -6        | -18        | -13        |
| 34  | 317.2      | 273.2      | 15-KETE                  | -60       | -6        | -18        | -13        |
| 35  | 349.2      | 331.3      | 15-Keto PGE2             | -50       | -9        | -15        | -13        |
| 36  | 353.3      | 209        | 15-Keto-PGF2 $\alpha$    | -45       | -6        | -15        | -13        |
| 37  | 319.3      | 233.0      | 16-HETE                  | -38       | -6        | -22        | -22        |
| 38  | 317.2      | 259.2      | 17(18)-EpETE             | -55       | -6        | -15        | -13        |
| 39  | 335.3      | 247.2      | 17,18-DiHETE             | -70       | -6        | -24        | -13        |
| 40  | 343.3      | 281.2      | 17-HDoHE                 | -55       | -6        | -18        | -13        |
| 41  | 343.3      | 281.2      | 19(20)-EpDPE             | -60       | -6        | -18        | -13        |
| 42  | 361.3      | 273.2      | 19,20-DiHDoPA            | -80       | -6        | -24        | -13        |
| 43  | 319.2      | 275.2      | 20-HETE                  | -95       | -6        | -24        | -13        |
| 44  | 343.3      | 281.2      | 4-HDoHE                  | -60       | -6        | -18        | -13        |
| 45  | 335.3      | 173.1      | 5,15-DiHETE              | -40       | -6        | -18        | -13        |
| 46  | 337.2      | 144.9      | 5,6-DHET                 | -46       | -6        | -27        | -27        |
| 47  | 337.3      | 145.1      | 5,6-DiHETrE              | -55       | -6        | -24        | -13        |
| 48  | 319.3      | 191.2      | 5,6-EET                  | -32       | -7        | -19        | -20        |
| 49  | 317.2      | 115.1      | 5-HEPE                   | -40       | -6        | -21        | -13        |
| 50  | 319.2      | 115.1      | 5-HETE                   | -50       | -6        | -18        | -13        |
| 51  | 317.2      | 203.2      | 5-KETE                   | -75       | -6        | -27        | -13        |
| 52  | 369.3      | 163.1      | 6-keto PGF1 $\alpha$     | -70       | -9        | -33        | -13        |
| 53  | 335.3      | 195.2      | 6-trans-LTB4             | -85       | -6        | -21        | -13        |
| 54  | 319.2      | 155.1      | 8(9)-EpETrE              | -40       | -6        | -18        | -13        |
| 55  | 335.3      | 235.2      | 8,15-DiHETE              | -65       | -6        | -21        | -13        |
| 56  | 337.2      | 126.8      | 8,9-DHET                 | -45       | -6        | -32        | -25        |
| 57  | 337.3      | 127.1      | 8,9-DiHETrE              | -65       | -6        | -27        | -13        |
| 58  | 319.3      | 68.9       | 8,9-EET                  | -37       | -5.5      | -34        | -25        |

**Continued**

| <b>NO.</b> | <b>Q1<br/>(Da)</b> | <b>Q3<br/>(Da)</b> | <b>Compound</b> | <b>DP<br/>(V)</b> | <b>EP<br/>(V)</b> | <b>CE<br/>(ev)</b> | <b>CXP<br/>(V)</b> |
|------------|--------------------|--------------------|-----------------|-------------------|-------------------|--------------------|--------------------|
| 59         | 319.3              | 155.1              | 8-HETE          | -42               | -5                | -25                | -25                |
| 60         | 293.2              | 275.2              | 9(10)-EpODE     | -65               | -6                | -18                | -13                |
| 61         | 295.2              | 171.1              | 9(10)-EpOME     | -75               | -6                | -21                | -13                |
| 62         | 311.2              | 201.2              | 9,10-DiHODE     | -65               | -6                | -27                | -13                |
| 63         | 313.3              | 201.2              | 9,10-DiHOME     | -65               | -6                | -27                | -13                |
| 64         | 315.2              | 297.2              | 9,10-e-DiHO     | -110              | -6                | -30                | -13                |
| 65         | 297.3              | 279.2              | 9,10-EpO        | -105              | -8                | -27                | -13                |
| 66         | 329.2              | 211.2              | 9,12,13-TriHOME | -60               | -6                | -30                | -13                |
| 67         | 317.2              | 167.2              | 9-HEPE          | -45               | -6                | -18                | -13                |
| 68         | 319.2              | 167.1              | 9-HETE          | -60               | -6                | -18                | -13                |
| 69         | 295.0              | 171.0              | 9-HODE          | -42               | -6                | -25                | -21                |
| 70         | 295.2              | 171.1              | 9-HODE-2        | -70               | -6                | -24                | -13                |
| 71         | 293.2              | 171.1              | 9-HOTE          | -60               | -6                | -21                | -13                |
| 72         | 293.2              | 185.2              | 9-KODE          | -100              | -6                | -27                | -13                |
| 73         | 326.2              | 308.2              | 9-Nitrooleate   | -50               | -8                | -18                | -13                |
| 74         | 303.2              | 259.2              | AA              | -45               | -8                | -20                | -16                |
| 75         | 277.4              | 259.2              | ALA             | -115              | -8                | -24                | -13                |
| 76         | 353.01             | 113.01             | 11-epi-PGF2a    | -40               | -6.5              | -28                | -18                |
| 77         | 327.2              | 283.2              | DHA             | -45               | -8                | -15                | -13                |
| 78         | 301.4              | 257.2              | EPA             | -60               | -8                | -15                | -13                |
| 79         | 279.4              | 261.2              | LA              | -185              | -8                | -38                | -13                |
| 80         | 351.3              | 217.2              | Lipoxin A4      | -45               | -6                | -27                | -13                |
| 81         | 351.3              | 221.2              | Lipoxin B4      | -55               | -4.5              | -22                | -13                |
| 82         | 335.3              | 195.2              | LTB4            | -50               | -6                | -24                | -13                |
| 83         | 333.3              | 195.2              | LTB5            | -50               | -6                | -21                | -13                |
| 84         | 335.3              | 113.2              | PGB1            | -60               | -9                | -37                | -19                |
| 85         | 351.3              | 271.2              | PGD2            | -40               | -4.5              | -24                | -13                |
| 86         | 353.3              | 317.2              | PGE1            | -40               | -4.5              | -18                | -13                |
| 87         | 351.3              | 271.2              | PGE2            | -40               | -4.5              | -21                | -13                |

**Continued**

| <b>NO.</b> | <b>Q1<br/>(Da)</b> | <b>Q3<br/>(Da)</b> | <b>Compound</b> | <b>DP<br/>(V)</b> | <b>EP<br/>(V)</b> | <b>CE<br/>(ev)</b> | <b>CXP<br/>(V)</b> |
|------------|--------------------|--------------------|-----------------|-------------------|-------------------|--------------------|--------------------|
| 88         | 333.3              | 271.3              | PGA2            | -32               | -4.5              | -23                | -17                |
| 89         | 349.3              | 269.2              | PGE3            | -35               | -4.5              | -21                | -13                |
| 90         | 353.3              | 309.3              | PGF2a           |                   |                   |                    |                    |
| 91         | 351.3              | 307.4              | PGF3a           | -60               | -4.5              | -24                | -13                |
| 92         | 333.2              | 189.2              | PGJ2            | -20               | -4                | -25                | -18                |
| 93         | 359.3              | 153.1              | Protectin DX    | -40               | -6                | -22                | -13                |
| 94         | 375.3              | 215.1              | Resolvin D1     | -40               | -6                | -26                | -13                |
| 95         | 375.3              | 277.2              | Resolvin D2     | -50               | -4.5              | -18                | -13                |
| 96         | 349.3              | 195.2              | Resolvin E1     | -50               | -5                | -22                | -13                |
| 97         | 333.3              | 115.1              | Resolvin E2     | -40               | -5                | -18                | -13                |
| 98         | 369.2              | 169.0              | TXB2            | -36               | -4                | -27                | -35                |
