# Supplementary material for: The arachidonic acid metabolome reveals elevation of prostaglandin E2 biosynthesis in colorectal cancer
Source: Royal Society of Chemistry journal article supplement (doi:10.1039/d3an01723k), 2024-01-01
Supplement: d3an01723k2.pdf [file d3an01723k2.pdf]

Table S2 Summary of pathologic characteristics in CRC patients and healthy control for For IHC analysis

| <b>Characteristics</b>              | <b>Case No.</b> |
|-------------------------------------|-----------------|
| <b>Total</b>                        | 71              |
| <b>Sex</b>                          |                 |
| Male                                | 41              |
| Female                              | 30              |
| <b>Age (years)</b>                  |                 |
| Mean                                | 62.4            |
| ≤60                                 | 30              |
| >60                                 | 41              |
| Range                               | 26-83           |
| <b>TNM stage</b>                    |                 |
| I                                   | 13              |
| II                                  | 21              |
| III                                 | 27              |
| IV                                  | 10              |
| <b>Tumor size</b>                   |                 |
| ≤5cm                                | 40              |
| >5cm                                | 27              |
| <b>Pathological differentiation</b> |                 |
| I-II                                | 54              |
| II-III                              | 17              |
